# Supplementary material for: Formation and photochemical investigation of brown carbon by hydroxyacetone reactions with glycine and ammonium sulfate
Source: PubMed Central journal article supplement (PMC9080858; doi:10.1039/c8ra02019a), 2018-06-06
Supplement: RA-008-C8RA02019A-s001.pdf [file RA-008-C8RA02019A-s001.pdf]

## Electronic Supplementary Information

### The Formation and Photochemical Investigation of Brown Carbon by Hydroxyacetone Reactions with Glycine and Ammonium Sulfate

Yan Gao and Yunhong Zhang\*

School of Chemistry and Chemical Engineering, Beijing Institute of Technology, Beijing 100081, China.

School of materials and Chemical Engineering, Bengbu College, Bengbu 233030, China. E-mail:

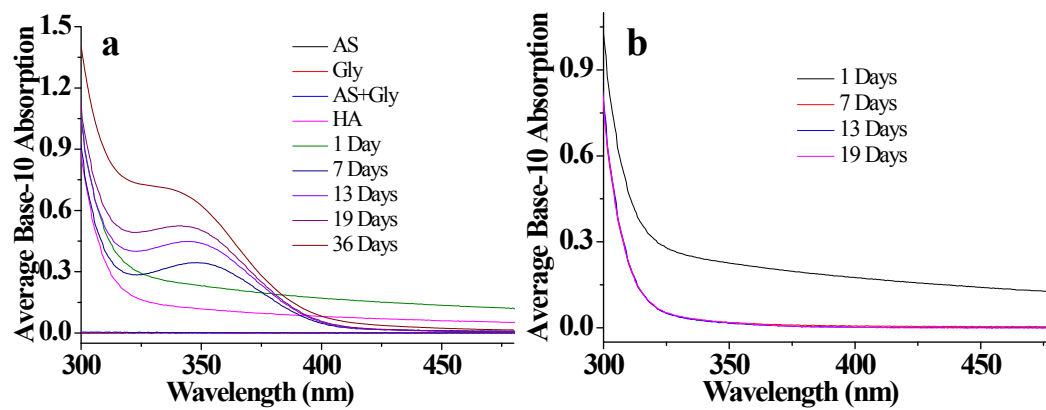

Fig. S1 UV/vis absorption spectra of HA-Gly-AS (a) and HA-AS mixtures (b) as a function of reaction time separately from 300-480 nm.

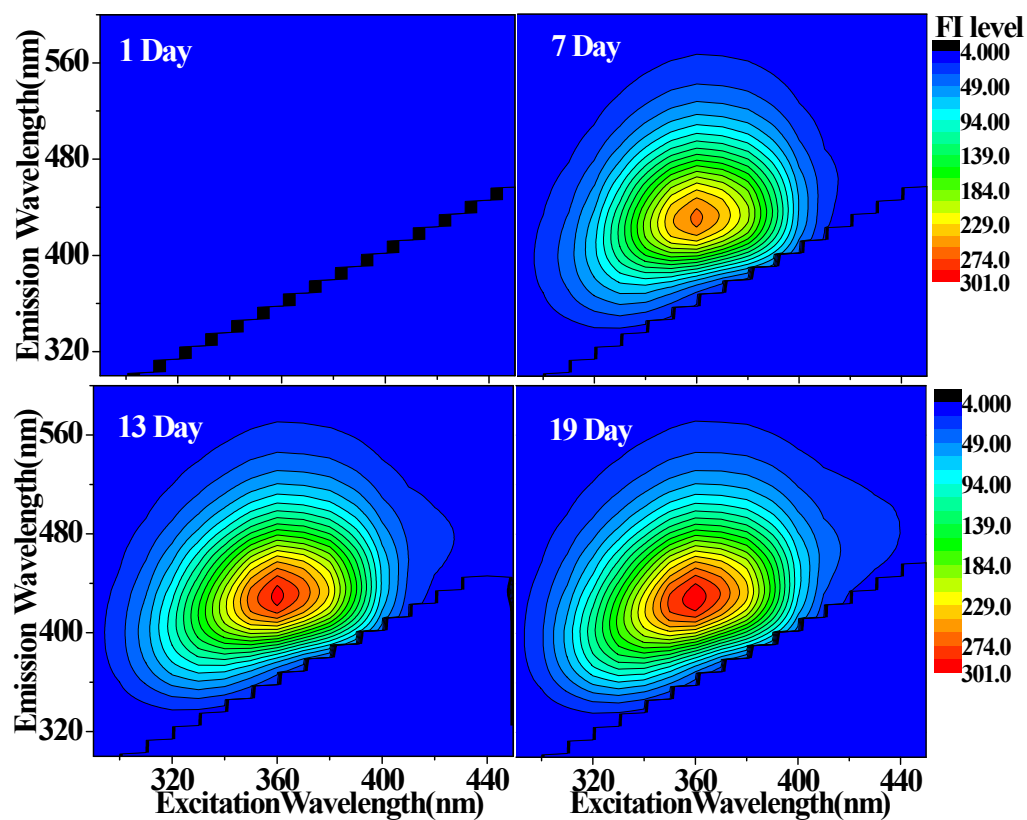

**Fig. S2** EEM plots of HA-Gly-AS mixtures as a function of reaction time. The fluorescence intensity (FI level, color coded as shown on the right) increased as a function of reaction time.

| solution                                | $\alpha$ (350 nm) $\text{cm}^{-1}$ | $I_{\text{area}}$ | QY % | AAE 400-480nm | FI    | BIX   |
|-----------------------------------------|------------------------------------|-------------------|------|---------------|-------|-------|
| QS(0.058M)                              | 0.00603                            | 12269.4           | 51   | -----         | ----- | ----- |
| HA-Gly-AS(7 day)                        | 0.23                               | 23533.7           | 2.56 | 9.07          | 2.09  | 0.65  |
| HA-Gly-AS(13 days)                      | 0.34                               | 26114.2           | 1.91 | 12.95         | 2.09  | 0.61  |
| HA-Gly-AS(19 days)                      | 0.44                               | 27504.2           | 1.57 | 14.57         | 2.10  | 0.63  |
| HA-Gly-AS(36 days)<br>Before photolysis | 0.62                               | 27430.7           | 1.11 | 9.42          | 2.12  | 0.66  |
| HA-Gly-AS(36 days)<br>After photolysis  | 0.15                               | 12856.4           | 2.15 | 7.86          | 2.35  | 0.86  |

**Table S1** Measured base-10 absorption coefficients  $\alpha$  correspond to 0.058 M QS solutions and 0.20 M HA-Gly-AS mixtures. The integrated emission intensities  $I_{\text{area}}$  correspond to the 350 nm excitation from 362 to 600 nm.

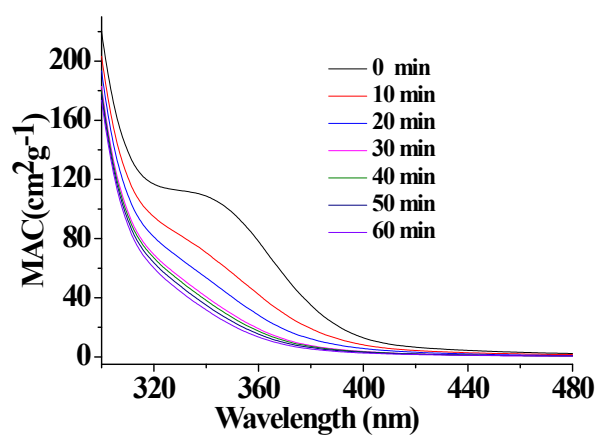

Fig. S3 UV/vis absorption spectra recorded during photolysis of HA-Gly-AS mixtures on the 300-480 nm range.

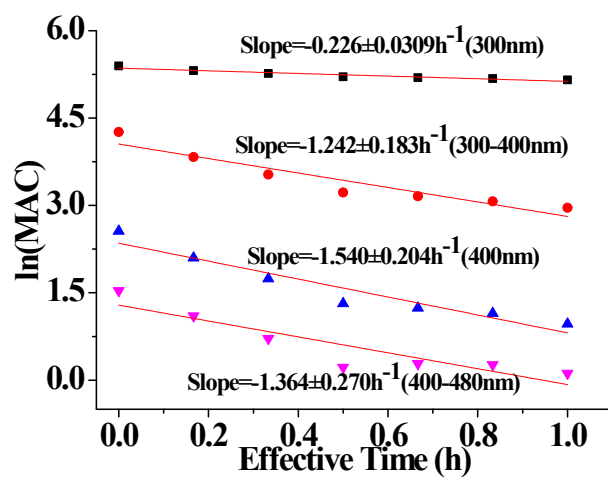

Fig. S4 Decay of absorbance during irradiation of HA-Gly aqueous mixtures.

| Wavelength(nm) | 300   | near-UV | 400   | visible |
|----------------|-------|---------|-------|---------|
| $k$            | 0.226 | 1.242   | 1.54  | 1.364   |
| $\tau$         | 3.067 | 0.558   | 0.450 | 0.508   |

**Table 2** Effective rate constant  $k$  and effective half-life  $\tau$  (in h) for the disappearance of absorbance at different wavelengths in HA-Gly-AS mixtures.

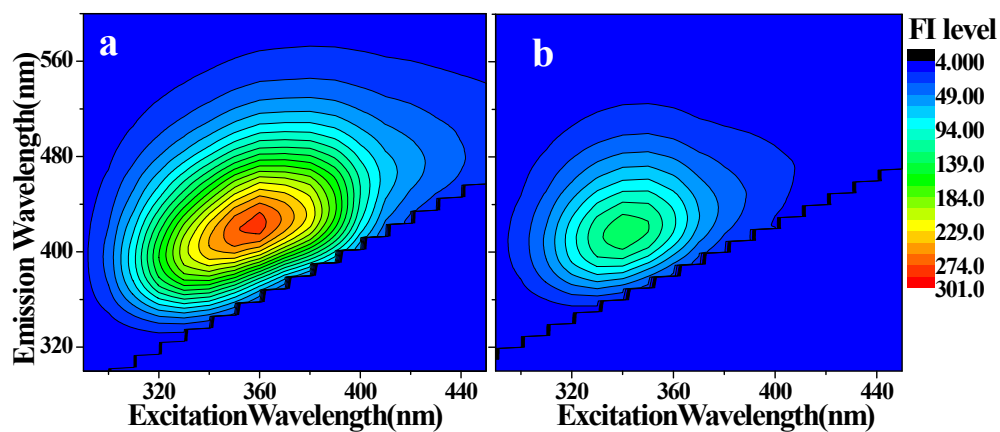

**Fig. S5** EEM spectrum recorded (a) before and (b) after photolysis of HA-Gly-AS mixtures.

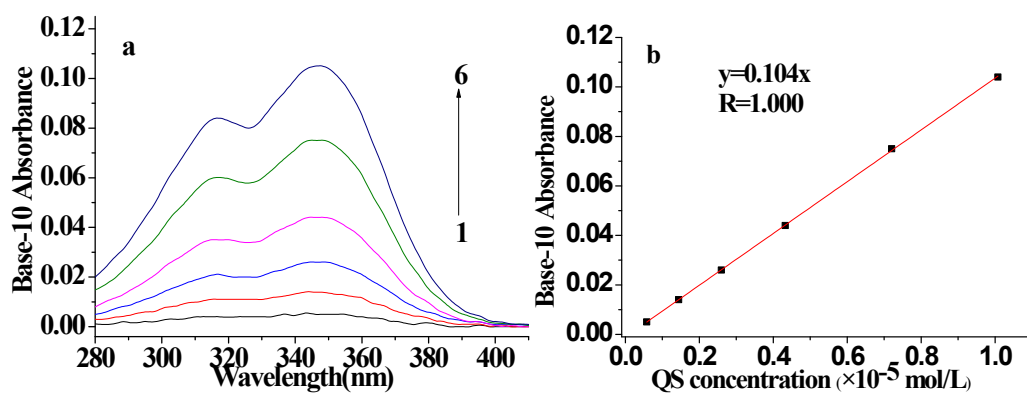

**Fig. S6 (a)** Absorption spectra of solutions of QS ( $C_{40}H_{48}N_4O_4 \cdot H_2SO_4 \cdot 2H_2O$ ) recorded at molar concentrations of 0.058, 0.144, 0.260, 0.433, 0.720,  $1.008 \times 10^{-5}$  M (1-6). These mixtures also pertained to the fluorescence measurements in Fig. S7(a). Base-10 absorbance of QS was measured for the quantum yield measurements. **Fig. S6(b)** Calibration of the measured base-10 absorbance vs. QS molar concentration in M.

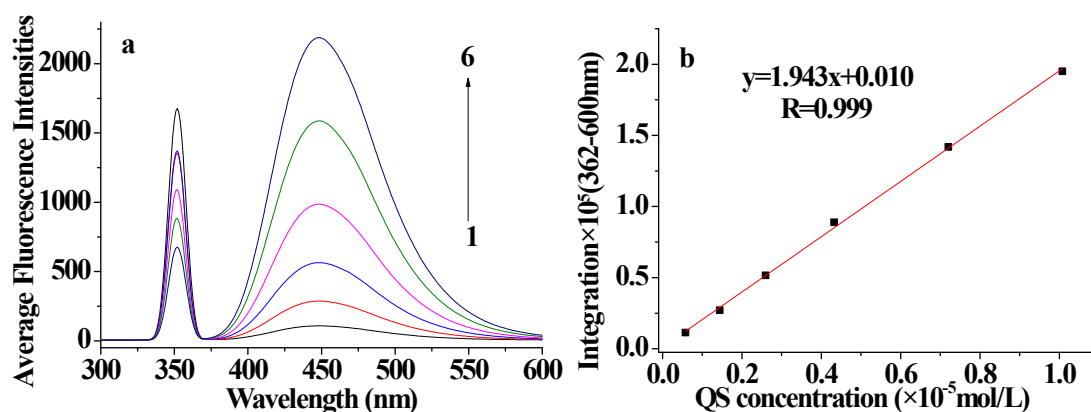

**Fig. S7(a)** Fluorescence measurements of QS solutions recorded at molar concentrations of 0.058, 0.144, 0.260, 0.433, 0.720,  $1.008 \times 10^{-5}$  M (1-6). Average fluorescence intensities of QS were measured for the quantum yield measurements. **Fig. S7(b)** Calibration of the integral area of fluorescence intensities vs. QS molar concentration in M.



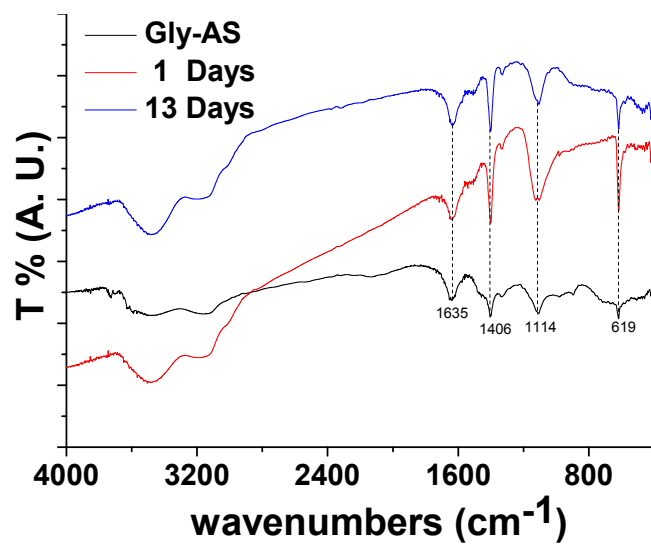

Fig. S8 Measured FTIR spectra of glycine and aqueous BrC aerosol from HA-Gly-AS mixtures.
